# Supplementary material for: HCl adsorption on ice at low temperature: a combined X-ray absorption, photoemission and infrared study
Source: Royal Society of Chemistry journal article supplement (doi:10.1039/c0cp02864a), 2011-01-01
Supplement: c0cp02864a.pdf [file c0cp02864a.pdf]

## Electronic Supplementary Information

### HCl adsorption on ice at low temperature: a combined X-ray absorption, photoemission and infrared study.

*Philippe Parent<sup>1\*</sup>, Jérôme Lasne<sup>1</sup>, Guillaume Marcotte<sup>2</sup> and Carine Laffon<sup>1</sup>*

<sup>1</sup>Laboratoire de Chimie-Physique, Matière et Rayonnement, Université Pierre-et-Marie Curie (UPMC-Univ Paris 06) and CNRS (UMR 7614), 11 rue Pierre-et-Marie-Curie, 75231 PARIS CEDEX 05-France. <sup>2</sup>Département de Chimie, Université de Sherbrooke, 2500 Boulevard de l'Université, Sherbrooke J1K2R1, Canada.

e-mail : philippe.parent@upmc.fr

| HCl exposure at 90 K (L) | HCl coverage at 90 K (ML) | HCl exposure at 50 K (L) | HCl coverage at 50 K (ML) |
|--------------------------|---------------------------|--------------------------|---------------------------|
| 0                        | 0                         | 0                        | 0                         |
| 0.1                      | 0.11                      | 0.1                      | 0.06                      |
| 0.2                      | 0.17                      | 0.3                      | 0.16                      |
| 0.3                      | 0.22                      | 0.5                      | 0.25                      |
| 0.5                      | 0.29                      | 1                        | 0.40                      |
| 0.7                      | 0.34                      | 2                        | 0.7                       |
| 1.0                      | 0.40                      | 7                        | 1.2                       |
| 3.0                      | 0.66                      | 13                       | 1.7                       |
| 8.0                      | 0.81                      | -                        | -                         |
| 16.0                     | 0.92                      | -                        | -                         |
| 40.0                     | 0.96                      | -                        | -                         |
| 80.0                     | 1.0                       | -                        | -                         |

**Table S1.** Relation between the HCl exposures (in Langmuir, L) and the HCl coverages (in monolayers, ML) at 90 and 50 K as deduced from the NEXAFS intensities at 207 eV.

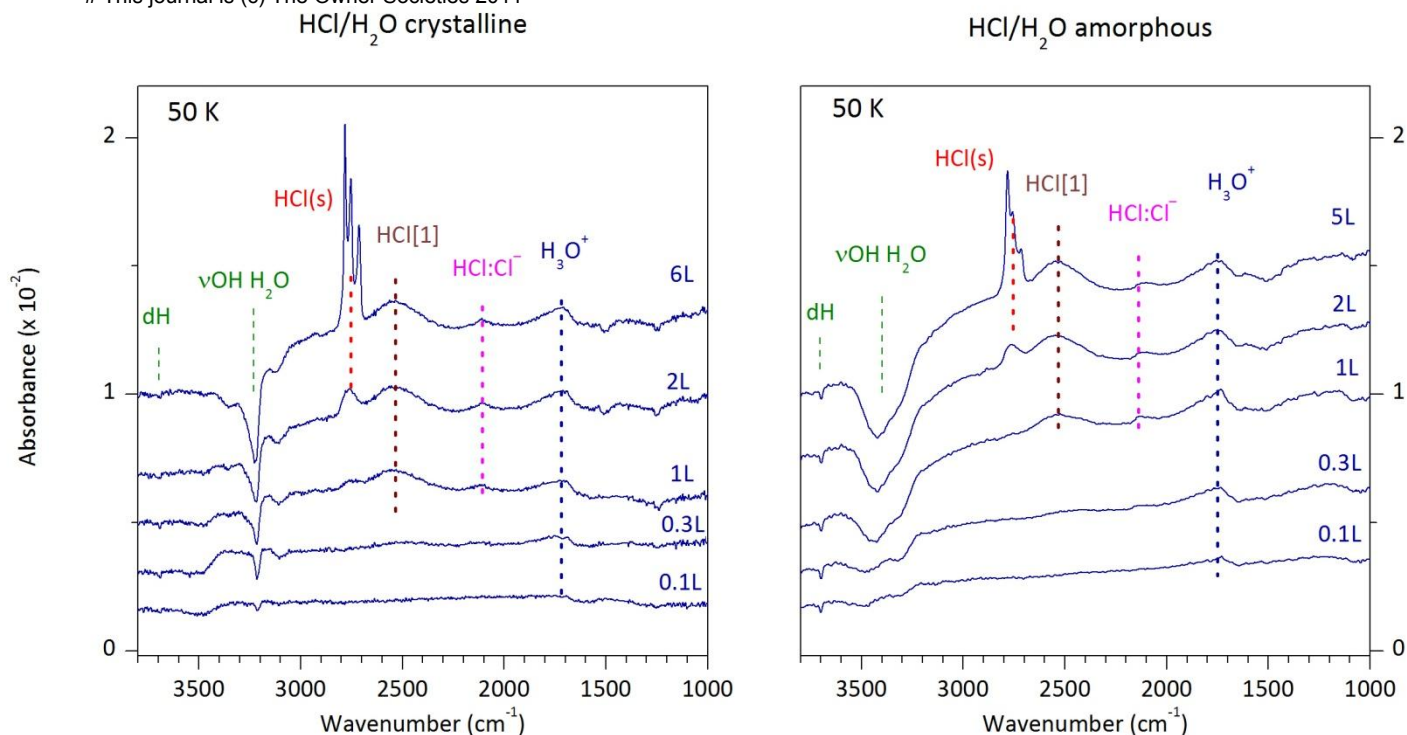

**Fig. S1.** Difference infrared spectra of a 4 ML crystalline (left) and amorphous (right) ice films exposed to HCl at 50 K. Qualitatively, the same adsorption mode are detected on the two substrates : H<sub>3</sub>O<sup>+</sup>, HCl: Cl<sup>-</sup>, HCl[1] and HCl(s).

Ref 21

M. J. Frisch, G. W. Trucks, H. B. Schlegel, G. E. Scuseria, M. A. Robb, J. R. Cheeseman, J. A. Montgomery, Jr., T. Vreven, K. N. Kudin, J. C. Burant, J. M. Millam, S. S. Iyengar, J. Tomasi, V. Barone, B. Mennucci, M. Cossi, G. Scalmani, N. Rega, G. A. Petersson, H. Nakatsuji, M. Hada, M. Ehara, K. Toyota, R. Fukuda, J. Hasegawa, M. Ishida, T. Nakajima, Y. Honda, O. Kitao, H. Nakai, M. Klene, X. Li, J. E. Knox, H. P. Hratchian, J. B. Cross, C. Adamo, J. Jaramillo, R. Gomperts, R. E. Stratmann, O. Yazyev, A. J. Austin, R. Cammi, C. Pomelli, J. W. Ochterski, P. Y. Ayala, K. Morokuma, G. A. Voth, P. Salvador, J. J. Dannenberg, V. G. Zakrzewski, S. Dapprich, A. D. Daniels, M. C. Strain, O. Farkas, D. K. Malick, A. D. Rabuck, K. Raghavachari, J. B. Foresman, J. V. Ortiz, Q. Cui, A. G. Baboul, S. Clifford, J. Cioslowski, B. B. Stefanov, G. Liu, A. Liashenko, P. Piskorz, I. Komaromi, R. L. Martin, D. J. Fox, T. Keith, M. A. Al-Laham, C. Y. Peng, A. Nanayakkara, M. Challacombe, P. M. W. Gill, B. Johnson, W. Chen, M. W. Wong, C. Gonzalez and J. A. Pople, Gaussian 03, Revision B.05; Gaussian, Inc., Pittsburgh PA, 2003.
